# Supplementary material
Source: PubMed Central journal article supplement (PMC3227680)

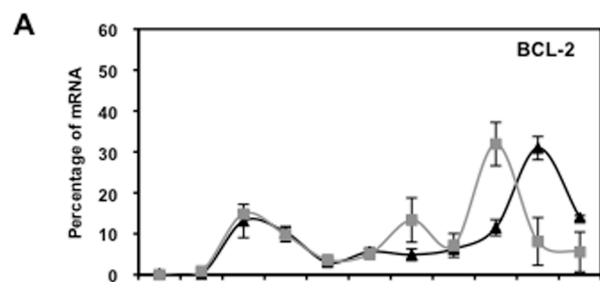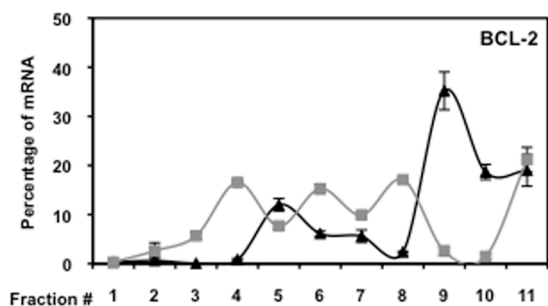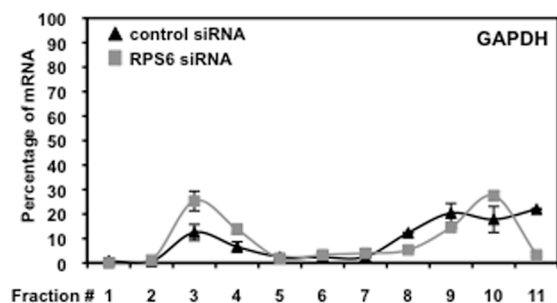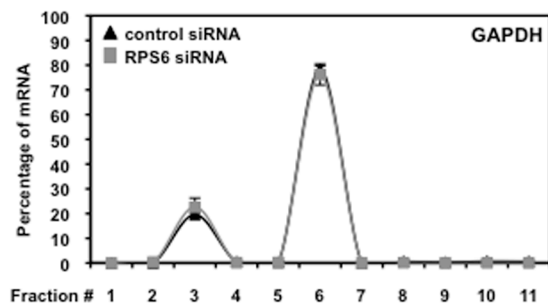

**MCF-7**

**HeLa**

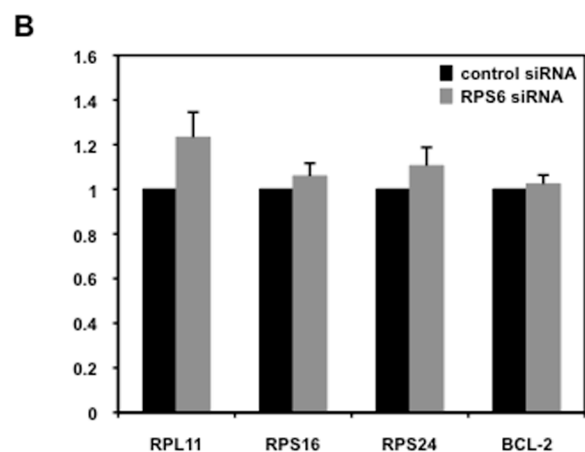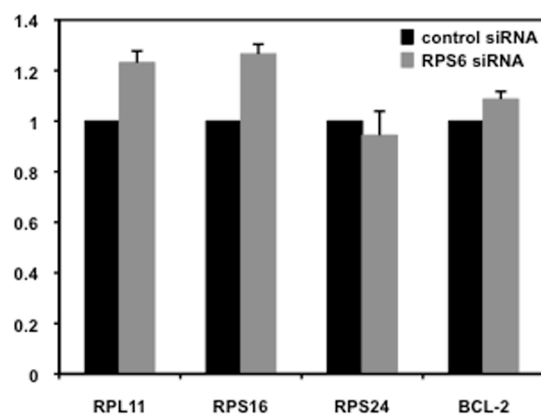

**MCF-7**

**HeLa**

Supplement: NIHMS337677-supplement-Sup_Figure_1.pdf [file NIHMS337677-supplement-Sup_Figure_1.pdf]

OCI-LY3

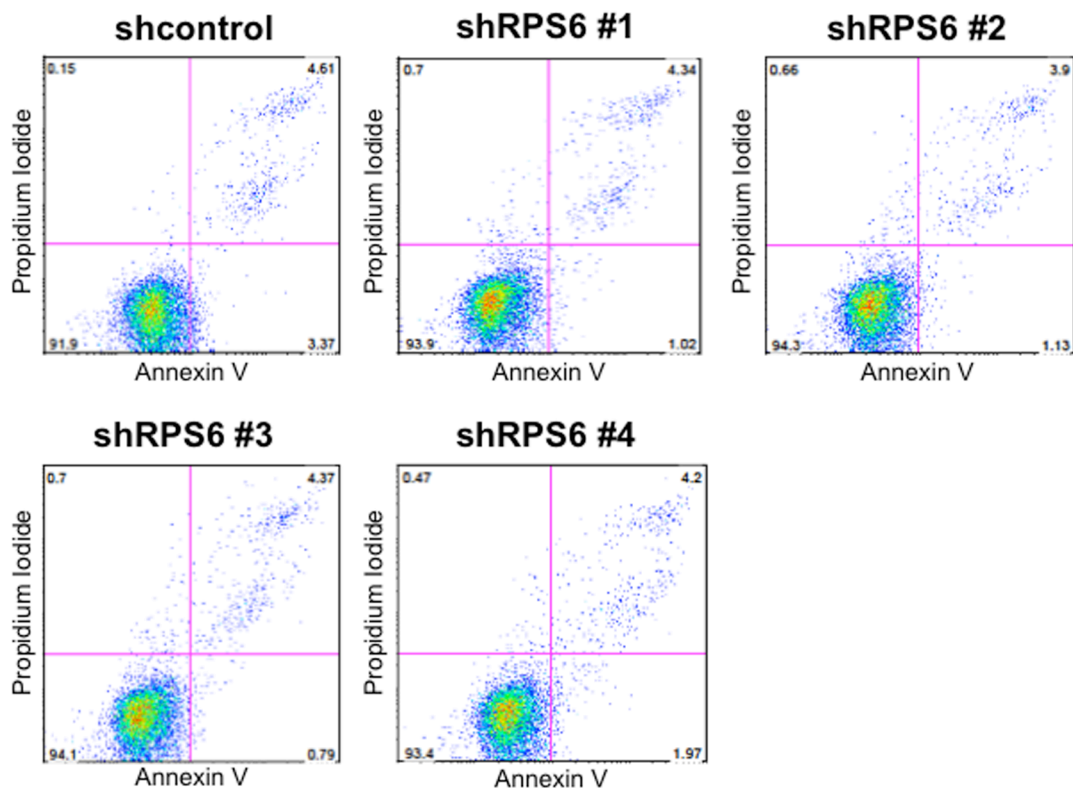

SUDHL-6

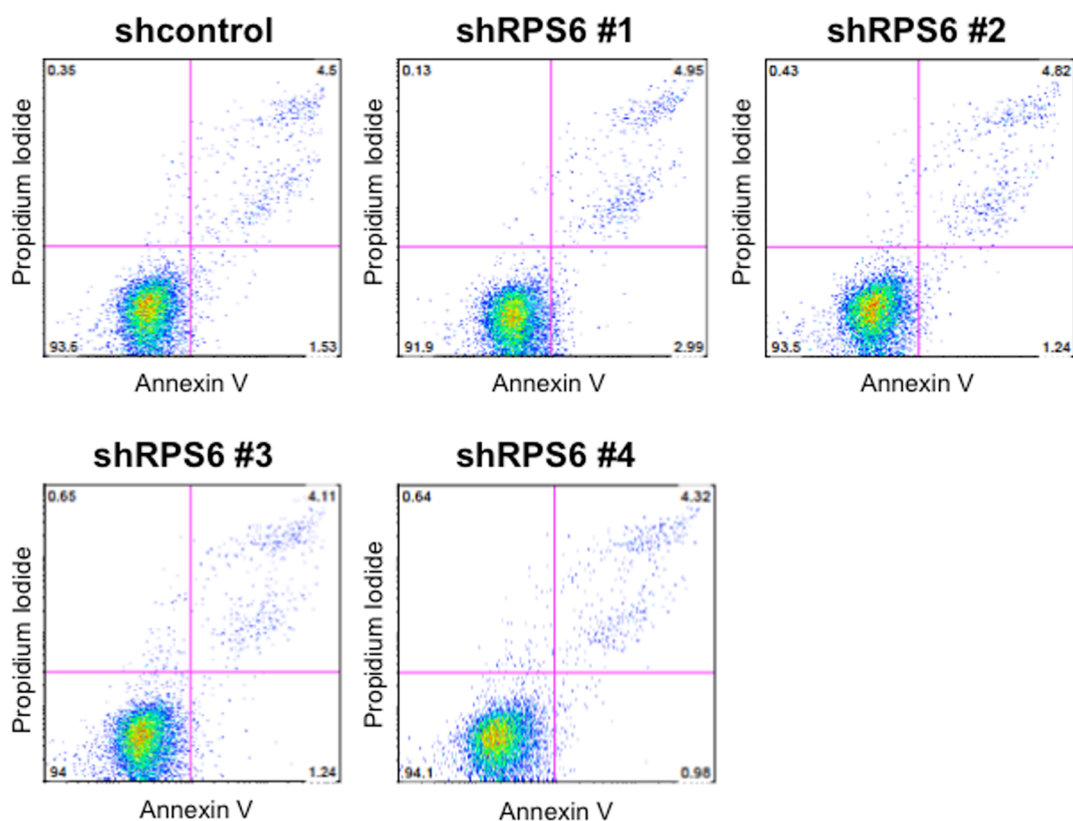

Supplement: NIHMS337677-supplement-Sup_Figure_2.pdf [file NIHMS337677-supplement-Sup_Figure_2.pdf]
